# Supplementary material for: Impact of rewarming rate on interleukin-6 levels in patients with shockable cardiac arrest receiving targeted temperature management at 33 °C: the ISOCRATE pilot randomized controlled trial
Source: Springer Nature journal article supplement (doi:10.1186/s13054-021-03842-9), 2021-12-01

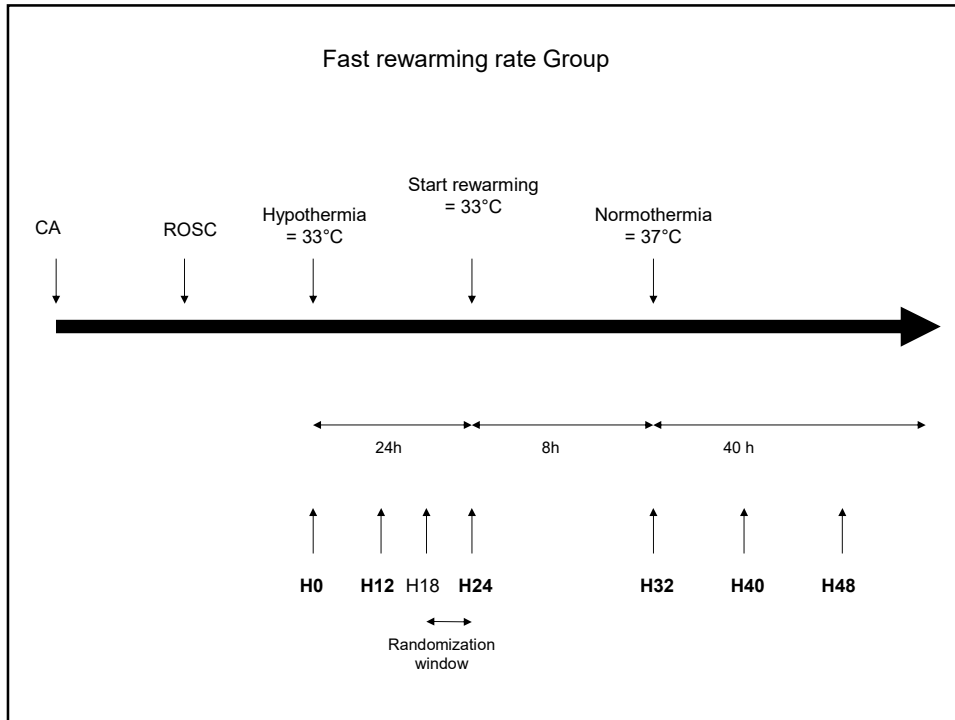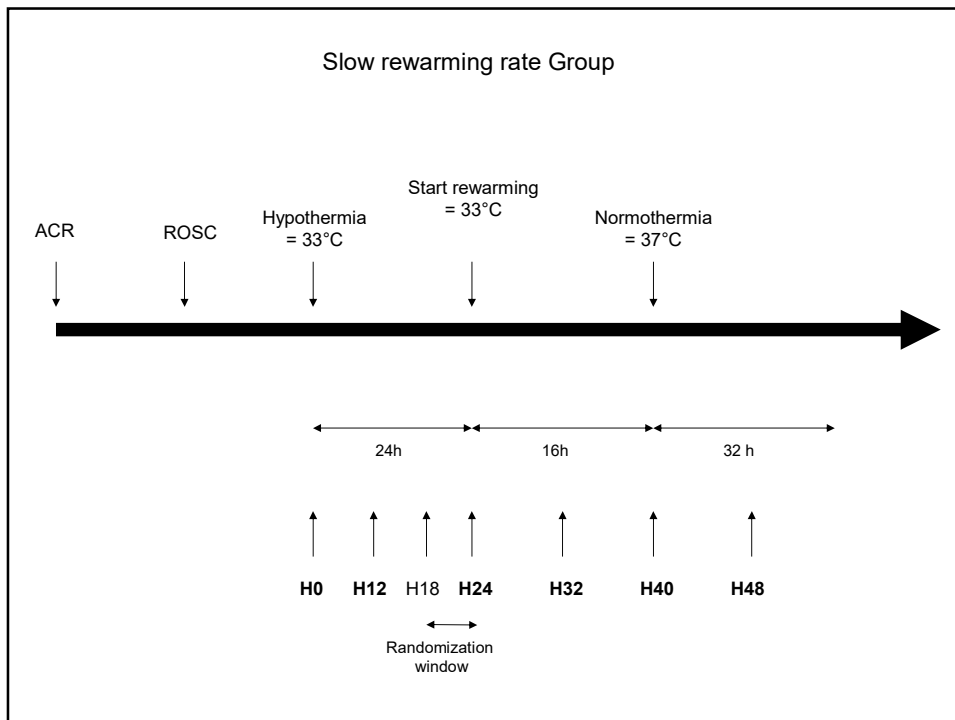

Supplement: MOESM1 [file 19967050]
